# Supplementary material for: Elucidating the Role of Transcriptomic Networks and DNA Methylation in Collagen Deposition of Dezhou Donkey Skin
Source: MDPI journal article supplement (doi:10.3390/ani14081222), 2024-04-18

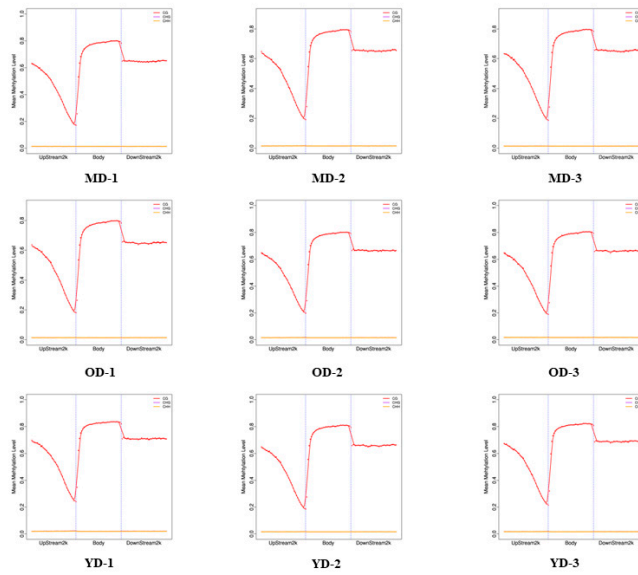

**Supplementary Figure S1.** DNA methylation trends upstream and downstream of genome-specific elements in every sample.

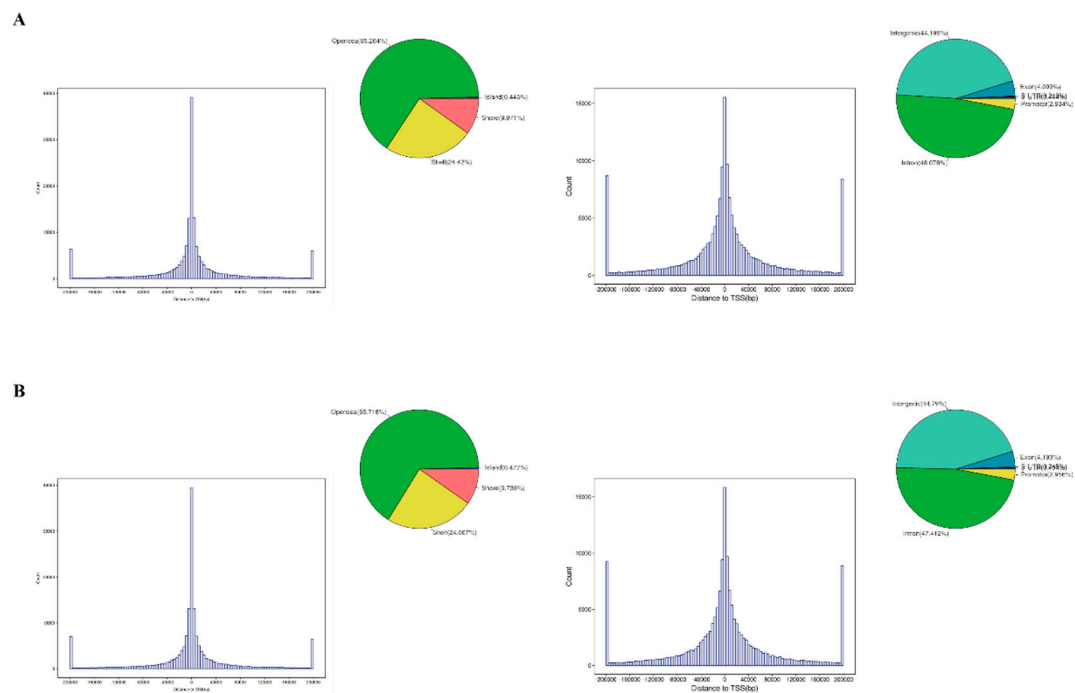

**Supplementary Figure S2.** The frequency distribution histogram of the distance from DMR to CGI and the distance from DMR to TSS. The DMR Annotation in CGI function elements (Island, Shore, Shelf and Opensea) and genome functional regions (5'UTR, 3'UTR, Exon, Intron, Promoter, Intergenic). (A) YD-vs-MD group. (B) YD-vs-OD group.

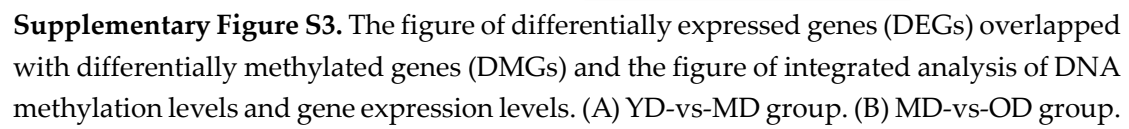

Supplement: s1 [file s1]
